# Supplementary material
Source: publisher site journal article supplement (https://www.dovepress.com/article/258696)
Supplement: Supplementary file 1 [file get_supplementary_file.php]

**Supplementary Figure 1.** Overview of paper selection process.

**Supplementary Table 1.** Raw data on journal sources of pain and depression publications.

| **Source Titles** | **records** | **% of 676** |
| --- | --- | --- |
| MUSCLE NERVE | 16 | 2.367 |
| PAIN | 16 | 2.367 |
| PLOS ONE | 16 | 2.367 |
| JOURNAL OF PAIN | 14 | 2.071 |
| MEDICINE AND SCIENCE IN SPORTS AND EXERCISE | 13 | 1.923 |
| JOURNAL OF NEUROSCIENCE | 10 | 1.479 |
| NEUROSCIENCE | 10 | 1.479 |
| PHYSICAL THERAPY | 10 | 1.479 |
| JOURNAL OF DIABETES AND ITS COMPLICATIONS | 9 | 1.331 |
| JOURNAL OF THE PERIPHERAL NERVOUS SYSTEM | 9 | 1.331 |
| ARCHIVES OF PHYSICAL MEDICINE AND REHABILITATION | 8 | 1.183 |
| SUPPORTIVE CARE IN CANCER | 8 | 1.183 |
| AMERICAN JOURNAL OF PHYSICAL MEDICINE REHABILITATION | 7 | 1.036 |
| EXPERIMENTAL NEUROLOGY | 7 | 1.036 |
| ANESTHESIA AND ANALGESIA | 6 | 0.888 |
| DIABETES METABOLISM RESEARCH AND REVIEWS | 6 | 0.888 |
| JOURNAL OF NEUROTRAUMA | 6 | 0.888 |
| MOLECULAR PAIN | 6 | 0.888 |
| NEUROSCIENCE LETTERS | 6 | 0.888 |
| CLINICS | 5 | 0.740 |
| DEVELOPMENTAL NEUROBIOLOGY | 5 | 0.740 |
| DIABETES | 5 | 0.740 |
| EUROPEAN JOURNAL OF NEUROSCIENCE | 5 | 0.740 |
| NEUROLOGY | 5 | 0.740 |
| NEUROREHABILITATION AND NEURAL REPAIR | 5 | 0.740 |
| SPINE | 5 | 0.740 |
| BMC MUSCULOSKELETAL DISORDERS | 4 | 0.592 |
| DIABETES CARE | 4 | 0.592 |
| DIABETES RESEARCH AND CLINICAL PRACTICE | 4 | 0.592 |
| DIABETIC MEDICINE | 4 | 0.592 |
| JOURNAL OF CELLULAR PHYSIOLOGY | 4 | 0.592 |
| JOURNAL OF NEUROPHYSIOLOGY | 4 | 0.592 |
| JOURNAL OF NEUROSCIENCE METHODS | 4 | 0.592 |
| JOURNAL OF NEUROSURGERY | 4 | 0.592 |
| JOURNAL OF PHYSICAL THERAPY SCIENCE | 4 | 0.592 |
| JOURNAL OF THE AMERICAN GERIATRICS SOCIETY | 4 | 0.592 |
| LIFE SCIENCES | 4 | 0.592 |
| NEURAL PLASTICITY | 4 | 0.592 |
| PAIN MEDICINE | 4 | 0.592 |
| SKELETAL RADIOLOGY | 4 | 0.592 |
| ANNALS OF NEUROLOGY | 3 | 0.444 |
| BRAIN RESEARCH | 3 | 0.444 |
| DIABETOLOGIA | 3 | 0.444 |
| EUROPEAN JOURNAL OF PHARMACOLOGY | 3 | 0.444 |
| FRONTIERS IN NEUROSCIENCE | 3 | 0.444 |
| GERONTOLOGY | 3 | 0.444 |
| ISOKINETICS AND EXERCISE SCIENCE | 3 | 0.444 |
| JOURNAL OF BACK AND MUSCULOSKELETAL REHABILITATION | 3 | 0.444 |
| JOURNAL OF NEUROCHEMISTRY | 3 | 0.444 |
| JOURNAL OF THE NEUROLOGICAL SCIENCES | 3 | 0.444 |
| NEURAL REGENERATION RESEARCH | 3 | 0.444 |
| NEUROLOGICAL RESEARCH | 3 | 0.444 |
| ONCOLOGY RESEARCH AND TREATMENT | 3 | 0.444 |
| PHYSICAL MEDICINE AND REHABILITATION CLINICS OF NORTH AMERICA | 3 | 0.444 |
| PHYSICIAN AND SPORTSMEDICINE | 3 | 0.444 |
| ACTA NEUROCHIRURGICA | 2 | 0.296 |
| ACTA PHYSIOLOGICA | 2 | 0.296 |
| ANESTHESIOLOGY | 2 | 0.296 |
| ANNALS OF CLINICAL AND TRANSLATIONAL NEUROLOGY | 2 | 0.296 |
| BEHAVIORAL AND BRAIN FUNCTIONS | 2 | 0.296 |
| BIOLOGICAL PHARMACEUTICAL BULLETIN | 2 | 0.296 |
| BIOLOGICAL RESEARCH FOR NURSING | 2 | 0.296 |
| BMC CANCER | 2 | 0.296 |
| BMC NEUROLOGY | 2 | 0.296 |
| BONE | 2 | 0.296 |
| BRAIN RESEARCH BULLETIN | 2 | 0.296 |
| BRITISH JOURNAL OF NEUROSURGERY | 2 | 0.296 |
| BRITISH JOURNAL OF SPORTS MEDICINE | 2 | 0.296 |
| CLINICAL BIOMECHANICS | 2 | 0.296 |
| CLINICAL REHABILITATION | 2 | 0.296 |
| CURRENT DIABETES REPORTS | 2 | 0.296 |
| CURRENT NEUROPHARMACOLOGY | 2 | 0.296 |
| DIABETES TECHNOLOGY THERAPEUTICS | 2 | 0.296 |
| DIABETOLOGY METABOLIC SYNDROME | 2 | 0.296 |
| EUROPEAN JOURNAL OF NEUROLOGY | 2 | 0.296 |
| EUROPEAN JOURNAL OF PAIN | 2 | 0.296 |
| EXPERIMENTAL AND THERAPEUTIC MEDICINE | 2 | 0.296 |
| FASEB JOURNAL | 2 | 0.296 |
| FRONTIERS IN CELLULAR NEUROSCIENCE | 2 | 0.296 |
| FRONTIERS IN PHYSIOLOGY | 2 | 0.296 |
| INTERNATIONAL JOURNAL OF RADIATION ONCOLOGY BIOLOGY PHYSICS | 2 | 0.296 |
| INTERNATIONAL REVIEW OF NEUROBIOLOGY | 2 | 0.296 |
| JOURNAL OF ALTERNATIVE AND COMPLEMENTARY MEDICINE | 2 | 0.296 |
| JOURNAL OF BIOMATERIALS AND TISSUE ENGINEERING | 2 | 0.296 |
| JOURNAL OF CHILD NEUROLOGY | 2 | 0.296 |
| JOURNAL OF CLINICAL ONCOLOGY | 2 | 0.296 |
| JOURNAL OF DIABETES INVESTIGATION | 2 | 0.296 |
| JOURNAL OF DIABETES RESEARCH | 2 | 0.296 |
| JOURNAL OF ELECTROMYOGRAPHY AND KINESIOLOGY | 2 | 0.296 |
| JOURNAL OF PAIN RESEARCH | 2 | 0.296 |
| JOURNAL OF PHARMACOLOGICAL SCIENCES | 2 | 0.296 |
| JOURNAL OF PHYSIOLOGY LONDON | 2 | 0.296 |
| JOURNAL OF REHABILITATION RESEARCH AND DEVELOPMENT | 2 | 0.296 |
| JOURNAL OF SCIENCE AND MEDICINE IN SPORT | 2 | 0.296 |
| JOURNAL OF SEXUAL MEDICINE | 2 | 0.296 |
| JOURNAL OF THE AMERICAN PODIATRIC MEDICAL ASSOCIATION | 2 | 0.296 |
| JOURNAL OF THE ROYAL ARMY MEDICAL CORPS | 2 | 0.296 |
| LASERS IN MEDICAL SCIENCE | 2 | 0.296 |
| MOLECULAR NEUROBIOLOGY | 2 | 0.296 |
| NEUROBIOLOGY OF DISEASE | 2 | 0.296 |
| NEUROPHYSIOLOGIE CLINIQUE CLINICAL NEUROPHYSIOLOGY | 2 | 0.296 |
| ONCOLOGY NURSING FORUM | 2 | 0.296 |
| PHYSIOLOGY BEHAVIOR | 2 | 0.296 |
| PHYSIOTHERAPY THEORY AND PRACTICE | 2 | 0.296 |
| RESPIRATORY PHYSIOLOGY NEUROBIOLOGY | 2 | 0.296 |
| REVISTA BRASILEIRA DE MEDICINA DO ESPORTE | 2 | 0.296 |
| SCIENTIFIC REPORTS | 2 | 0.296 |
| ACTA BIOMATERIALIA | 1 | 0.148 |
| ACTA DIABETOLOGICA | 1 | 0.148 |
| ACTA ENDOCRINOLOGICA BUCHAREST | 1 | 0.148 |
| ACTA NEUROLOGICA BELGICA | 1 | 0.148 |
| ACTA NEUROPATHOLOGICA COMMUNICATIONS | 1 | 0.148 |
| ACTA NEUROPSYCHIATRICA | 1 | 0.148 |
| ACUPUNCTURE IN MEDICINE | 1 | 0.148 |
| ADVANCES IN EXPERIMENTAL MEDICINE AND BIOLOGY | 1 | 0.148 |
| ADVANCES IN PHYSIOLOGY EDUCATION | 1 | 0.148 |
| AGE | 1 | 0.148 |
| AMERICAN JOURNAL OF CHINESE MEDICINE | 1 | 0.148 |
| AMERICAN JOURNAL OF NEURORADIOLOGY | 1 | 0.148 |
| AMERICAN JOURNAL OF PHYSIOLOGY HEART AND CIRCULATORY PHYSIOLOGY | 1 | 0.148 |
| AMERICAN JOURNAL OF PHYSIOLOGY RENAL PHYSIOLOGY | 1 | 0.148 |
| AMERICAN JOURNAL OF SPORTS MEDICINE | 1 | 0.148 |
| ANALYTICAL AND QUANTITATIVE CYTOPATHOLOGY AND HISTOPATHOLOGY | 1 | 0.148 |
| ANATOMICAL RECORD ADVANCES IN INTEGRATIVE ANATOMY AND EVOLUTIONARY BIOLOGY | 1 | 0.148 |
| ANATOMICAL SCIENCE INTERNATIONAL | 1 | 0.148 |
| ANNALS OF ANATOMY ANATOMISCHER ANZEIGER | 1 | 0.148 |
| ANNALS OF ONCOLOGY | 1 | 0.148 |
| ANNALS OF THE AMERICAN THORACIC SOCIETY | 1 | 0.148 |
| ANNALS OF VASCULAR SURGERY | 1 | 0.148 |
| ANTIVIRAL RESEARCH | 1 | 0.148 |
| ARCHIVES OF IRANIAN MEDICINE | 1 | 0.148 |
| ARCHIVES OF MEDICAL SCIENCE | 1 | 0.148 |
| ARTHRITIS CARE RESEARCH | 1 | 0.148 |
| ARTHRITIS RHEUMATISM ARTHRITIS CARE RESEARCH | 1 | 0.148 |
| ARTHRITIS RHEUMATOLOGY | 1 | 0.148 |
| ASIA PACIFIC JOURNAL OF CLINICAL ONCOLOGY | 1 | 0.148 |
| ASN NEURO | 1 | 0.148 |
| BEHAVIOURAL BRAIN RESEARCH | 1 | 0.148 |
| BIOCHEMICAL AND BIOPHYSICAL RESEARCH COMMUNICATIONS | 1 | 0.148 |
| BIOCHIMICA ET BIOPHYSICA ACTA MOLECULAR BASIS OF DISEASE | 1 | 0.148 |
| BIOGERONTOLOGY | 1 | 0.148 |
| BIOMEDICAL MATERIALS | 1 | 0.148 |
| BIOSCIENCE REPORTS | 1 | 0.148 |
| BJOG AN INTERNATIONAL JOURNAL OF OBSTETRICS AND GYNAECOLOGY | 1 | 0.148 |
| BLOOD | 1 | 0.148 |
| BMC NEUROSCIENCE | 1 | 0.148 |
| BMC SYSTEMS BIOLOGY | 1 | 0.148 |
| BMJ OPEN | 1 | 0.148 |
| BOLETIN DE MALARIOLOGIA Y SALUD AMBIENTAL | 1 | 0.148 |
| BRAIN | 1 | 0.148 |
| BRAIN BEHAVIOR AND IMMUNITY | 1 | 0.148 |
| BRAIN IMAGING AND BEHAVIOR | 1 | 0.148 |
| BRAIN INJURY | 1 | 0.148 |
| BRAZILIAN JOURNAL OF MEDICAL AND BIOLOGICAL RESEARCH | 1 | 0.148 |
| BREAST CANCER RESEARCH AND TREATMENT | 1 | 0.148 |
| BREAST CARE | 1 | 0.148 |
| BRITISH JOURNAL OF CANCER | 1 | 0.148 |
| BRITISH JOURNAL OF PHARMACOLOGY | 1 | 0.148 |
| BRITISH JOURNAL OF RADIOLOGY | 1 | 0.148 |
| BRITISH POULTRY SCIENCE | 1 | 0.148 |
| BURNS | 1 | 0.148 |
| CANCER BIOLOGY THERAPY | 1 | 0.148 |
| CANCER CHEMOTHERAPY AND PHARMACOLOGY | 1 | 0.148 |
| CANCER PREVENTION RESEARCH | 1 | 0.148 |
| CELL BIOCHEMISTRY AND FUNCTION | 1 | 0.148 |
| CELL TRANSPLANTATION | 1 | 0.148 |
| CELLS TISSUES ORGANS | 1 | 0.148 |
| CENTRAL EUROPEAN JOURNAL OF BIOLOGY | 1 | 0.148 |
| CHILDS NERVOUS SYSTEM | 1 | 0.148 |
| CHINESE JOURNAL OF PHYSIOLOGY | 1 | 0.148 |
| CLINICAL AND EXPERIMENTAL IMMUNOLOGY | 1 | 0.148 |
| CLINICAL BREAST CANCER | 1 | 0.148 |
| CLINICAL INFECTIOUS DISEASES | 1 | 0.148 |
| CLINICAL INTERVENTIONS IN AGING | 1 | 0.148 |
| CLINICAL JOURNAL OF PAIN | 1 | 0.148 |
| CLINICAL NEUROLOGY AND NEUROSURGERY | 1 | 0.148 |
| CLINICAL NEUROPHYSIOLOGY | 1 | 0.148 |
| CLINICAL PHARMACOLOGY IN DRUG DEVELOPMENT | 1 | 0.148 |
| CLINICAL SPINE SURGERY | 1 | 0.148 |
| CLINICS IN SPORTS MEDICINE | 1 | 0.148 |
| COLORECTAL DISEASE | 1 | 0.148 |
| CRITICAL REVIEWS IN ONCOLOGY HEMATOLOGY | 1 | 0.148 |
| CURRENT DRUG DELIVERY | 1 | 0.148 |
| CURRENT DRUG METABOLISM | 1 | 0.148 |
| CURRENT MEDICINAL CHEMISTRY | 1 | 0.148 |
| CURRENT OSTEOPOROSIS REPORTS | 1 | 0.148 |
| DIABETES METABOLIC SYNDROME AND OBESITY TARGETS AND THERAPY | 1 | 0.148 |
| DIABETES THERAPY | 1 | 0.148 |
| DIABETES VASCULAR DISEASE RESEARCH | 1 | 0.148 |
| DISABILITY AND REHABILITATION | 1 | 0.148 |
| ENDOCRINE | 1 | 0.148 |
| ENDOCRINOLOGY | 1 | 0.148 |
| EUROPEAN JOURNAL OF APPLIED PHYSIOLOGY | 1 | 0.148 |
| EUROPEAN JOURNAL OF CANCER CARE | 1 | 0.148 |
| EUROPEAN JOURNAL OF PEDIATRICS | 1 | 0.148 |
| EUROPEAN JOURNAL OF PHYSICAL AND REHABILITATION MEDICINE | 1 | 0.148 |
| EUROPEAN JOURNAL OF TRAUMA AND EMERGENCY SURGERY | 1 | 0.148 |
| EUROPEAN SPINE JOURNAL | 1 | 0.148 |
| EVIDENCE BASED COMPLEMENTARY AND ALTERNATIVE MEDICINE | 1 | 0.148 |
| EXERCISE AND SPORT SCIENCES REVIEWS | 1 | 0.148 |
| EXERCISE ON BRAIN HEALTH | 1 | 0.148 |
| EXPERIMENTAL AND CLINICAL ENDOCRINOLOGY DIABETES | 1 | 0.148 |
| EXPERIMENTAL BRAIN RESEARCH | 1 | 0.148 |
| EXPERIMENTAL DIABETES RESEARCH | 1 | 0.148 |
| EXPERIMENTAL GERONTOLOGY | 1 | 0.148 |
| EXPERIMENTAL HEMATOLOGY ONCOLOGY | 1 | 0.148 |
| EXPERT REVIEW OF MEDICAL DEVICES | 1 | 0.148 |
| FOOD AND CHEMICAL TOXICOLOGY | 1 | 0.148 |
| FOOT ANKLE INTERNATIONAL | 1 | 0.148 |
| FRONTIERS IN HUMAN NEUROSCIENCE | 1 | 0.148 |
| FRONTIERS IN NEUROLOGY | 1 | 0.148 |
| FRONTIERS IN PHARMACOLOGY |  | 0.000 |
| GAIT POSTURE | 1 | 0.148 |
| HAEMOPHILIA | 1 | 0.148 |
| HAND SURGERY REHABILITATION | 1 | 0.148 |
| HEMATOLOGICAL ONCOLOGY | 1 | 0.148 |
| HUMAN MOLECULAR GENETICS | 1 | 0.148 |
| IEEE JOURNAL OF TRANSLATIONAL ENGINEERING IN HEALTH AND MEDICINE JTEHM | 1 | 0.148 |
| INDIAN JOURNAL OF MEDICAL RESEARCH | 1 | 0.148 |
| INJURY INTERNATIONAL JOURNAL OF THE CARE OF THE INJURED | 1 | 0.148 |
| INTEGRATIVE CANCER THERAPIES | 1 | 0.148 |
| INTERNATIONAL JOURNAL OF CLINICAL AND EXPERIMENTAL MEDICINE | 1 | 0.148 |
| INTERNATIONAL JOURNAL OF CLINICAL PRACTICE | 1 | 0.148 |
| INTERNATIONAL JOURNAL OF DIABETES IN DEVELOPING COUNTRIES | 1 | 0.148 |
| INTERNATIONAL JOURNAL OF MOLECULAR SCIENCES | 1 | 0.148 |
| INTERNATIONAL JOURNAL OF NEUROSCIENCE | 1 | 0.148 |
| INTERNATIONAL JOURNAL OF NURSING PRACTICE | 1 | 0.148 |
| INTERNATIONAL JOURNAL OF REHABILITATION RESEARCH | 1 | 0.148 |
| INTERNATIONAL JOURNAL OF SPORTS MEDICINE | 1 | 0.148 |
| INTERNATIONAL SPORTMED JOURNAL | 1 | 0.148 |
| INVESTIGATIVE OPHTHALMOLOGY VISUAL SCIENCE | 1 | 0.148 |
| INVESTIGATIVE RADIOLOGY | 1 | 0.148 |
| IRANIAN JOURNAL OF PUBLIC HEALTH | 1 | 0.148 |
| IRANIAN RED CRESCENT MEDICAL JOURNAL | 1 | 0.148 |
| IRISH JOURNAL OF MEDICAL SCIENCE | 1 | 0.148 |
| JAIDS JOURNAL OF ACQUIRED IMMUNE DEFICIENCY SYNDROMES | 1 | 0.148 |
| JAMA OPHTHALMOLOGY | 1 | 0.148 |
| JOURNAL OF APPLIED PHYSIOLOGY | 1 | 0.148 |
| JOURNAL OF APPLIED TOXICOLOGY | 1 | 0.148 |
| JOURNAL OF ATHLETIC TRAINING | 1 | 0.148 |
| JOURNAL OF BIOMECHANICS | 1 | 0.148 |
| JOURNAL OF BONE AND JOINT SURGERY AMERICAN VOLUME | 1 | 0.148 |
| JOURNAL OF CANCER RESEARCH AND CLINICAL ONCOLOGY | 1 | 0.148 |
| JOURNAL OF CANCER RESEARCH AND THERAPEUTICS | 1 | 0.148 |
| JOURNAL OF CLINICAL ANESTHESIA | 1 | 0.148 |
| JOURNAL OF CLINICAL MEDICINE | 1 | 0.148 |
| JOURNAL OF COMPARATIVE NEUROLOGY | 1 | 0.148 |
| JOURNAL OF DENTAL RESEARCH | 1 | 0.148 |
| JOURNAL OF DIABETES | 1 | 0.148 |
| JOURNAL OF ENDOCRINOLOGICAL INVESTIGATION | 1 | 0.148 |
| JOURNAL OF FOOT AND ANKLE RESEARCH | 1 | 0.148 |
| JOURNAL OF FOOT ANKLE SURGERY | 1 | 0.148 |
| JOURNAL OF GENERAL INTERNAL MEDICINE | 1 | 0.148 |
| JOURNAL OF HAND SURGERY AMERICAN VOLUME | 1 | 0.148 |
| JOURNAL OF HAND THERAPY | 1 | 0.148 |
| JOURNAL OF INTERNATIONAL MEDICAL RESEARCH | 1 | 0.148 |
| JOURNAL OF KNEE SURGERY | 1 | 0.148 |
| JOURNAL OF MAGNETIC RESONANCE IMAGING | 1 | 0.148 |
| JOURNAL OF MEDICINAL FOOD | 1 | 0.148 |
| JOURNAL OF MICROMECHANICS AND MICROENGINEERING | 1 | 0.148 |
| JOURNAL OF NEUROENGINEERING AND REHABILITATION | 1 | 0.148 |
| JOURNAL OF NEUROIMMUNOLOGY | 1 | 0.148 |
| JOURNAL OF NEUROINFLAMMATION | 1 | 0.148 |
| JOURNAL OF NEUROLOGIC PHYSICAL THERAPY | 1 | 0.148 |
| JOURNAL OF NEUROLOGY | 1 | 0.148 |
| JOURNAL OF NEUROSCIENCE RESEARCH | 1 | 0.148 |
| JOURNAL OF ORAL FACIAL PAIN AND HEADACHE | 1 | 0.148 |
| JOURNAL OF ORTHOPAEDIC TRAUMA | 1 | 0.148 |
| JOURNAL OF OVARIAN RESEARCH | 1 | 0.148 |
| JOURNAL OF PALLIATIVE MEDICINE | 1 | 0.148 |
| JOURNAL OF PARKINSONS DISEASE | 1 | 0.148 |
| JOURNAL OF PHARMACOKINETICS AND PHARMACODYNAMICS | 1 | 0.148 |
| JOURNAL OF PHARMACOLOGY AND EXPERIMENTAL THERAPEUTICS | 1 | 0.148 |
| JOURNAL OF PHARMACY AND PHARMACEUTICAL SCIENCES | 1 | 0.148 |
| JOURNAL OF PHARMACY AND PHARMACOLOGY | 1 | 0.148 |
| JOURNAL OF PHYSIOLOGICAL SCIENCES | 1 | 0.148 |
| JOURNAL OF PHYSIOLOGY AND PHARMACOLOGY | 1 | 0.148 |
| JOURNAL OF SPORT EXERCISE PSYCHOLOGY | 1 | 0.148 |
| JOURNAL OF SPORTS MEDICINE AND PHYSICAL FITNESS | 1 | 0.148 |
| JOURNAL OF SURGICAL EDUCATION | 1 | 0.148 |
| JOURNAL OF SURGICAL RESEARCH | 1 | 0.148 |
| JOURNAL OF THE AMERICAN ASSOCIATION FOR LABORATORY ANIMAL SCIENCE | 1 | 0.148 |
| JOURNAL OF THE AMERICAN MEDICAL DIRECTORS ASSOCIATION | 1 | 0.148 |
| JOURNAL OF UROLOGY | 1 | 0.148 |
| JOURNAL OF VASCULAR ACCESS | 1 | 0.148 |
| JOURNAL OF VETERINARY EMERGENCY AND CRITICAL CARE | 1 | 0.148 |
| JOURNAL OF VETERINARY INTERNAL MEDICINE | 1 | 0.148 |
| JOURNAL OF WOMENS HEALTH | 1 | 0.148 |
| JOURNAL OF WOUND OSTOMY AND CONTINENCE NURSING | 1 | 0.148 |
| KOREAN JOURNAL OF PAIN | 1 | 0.148 |
| LANCET ONCOLOGY | 1 | 0.148 |
| LARYNGOSCOPE | 1 | 0.148 |
| LATIN AMERICAN JOURNAL OF PHARMACY | 1 | 0.148 |
| LEUKEMIA RESEARCH | 1 | 0.148 |
| MANUAL THERAPY | 1 | 0.148 |
| MEDICAL HYPOTHESES | 1 | 0.148 |
| MEDICAL PHYSICS | 1 | 0.148 |
| MEDICAL SCIENCE MONITOR | 1 | 0.148 |
| MEDICAL ULTRASONOGRAPHY | 1 | 0.148 |
| MEDICINE | 1 | 0.148 |
| MICROVASCULAR RESEARCH | 1 | 0.148 |
| MOLECULAR BIOLOGY OF EYE DISEASE | 1 | 0.148 |
| MOLECULAR MEDICINE REPORTS | 1 | 0.148 |
| MOLECULAR PHARMACEUTICS | 1 | 0.148 |
| MOLECULES | 1 | 0.148 |
| NAGOYA JOURNAL OF MEDICAL SCIENCE | 1 | 0.148 |
| NATURE CLINICAL PRACTICE ENDOCRINOLOGY METABOLISM | 1 | 0.148 |
| NEURO ONCOLOGY | 1 | 0.148 |
| NEUROCHEMICAL RESEARCH | 1 | 0.148 |
| NEUROCHEMISTRY INTERNATIONAL | 1 | 0.148 |
| NEUROENDOCRINOLOGY LETTERS | 1 | 0.148 |
| NEUROLOGIC CLINICS | 1 | 0.148 |
| NEUROLOGICAL SCIENCES | 1 | 0.148 |
| NEUROMODULATION | 1 | 0.148 |
| NEURON | 1 | 0.148 |
| NEUROPEPTIDES | 1 | 0.148 |
| NEUROPHARMACOLOGY | 1 | 0.148 |
| NEUROQUANTOLOGY | 1 | 0.148 |
| NEUROSURGERY | 1 | 0.148 |
| NURSING HEALTH SCIENCES | 1 | 0.148 |
| NUTRIENTS | 1 | 0.148 |
| NUTRITION METABOLISM AND CARDIOVASCULAR DISEASES | 1 | 0.148 |
| OBESITY SURGERY | 1 | 0.148 |
| ONCOLOGY NEW YORK | 1 | 0.148 |
| ORAL ONCOLOGY | 1 | 0.148 |
| PACE PACING AND CLINICAL ELECTROPHYSIOLOGY | 1 | 0.148 |
| PAKISTAN JOURNAL OF MEDICAL SCIENCES | 1 | 0.148 |
| PEDIATRIC HEMATOLOGY AND ONCOLOGY | 1 | 0.148 |
| PFERDEHEILKUNDE | 1 | 0.148 |
| PHYSIOLOGY | 1 | 0.148 |
| PHYSIOLOGY INTERNATIONAL | 1 | 0.148 |
| PLASTIC AND RECONSTRUCTIVE SURGERY | 1 | 0.148 |
| PM R | 1 | 0.148 |
| PROGRESS IN MOLECULAR BIOLOGY AND TRANSLATIONAL SCIENCE | 1 | 0.148 |
| PSYCHO ONCOLOGY | 1 | 0.148 |
| PSYCHOPHARMACOLOGY | 1 | 0.148 |
| QUALITY OF LIFE RESEARCH | 1 | 0.148 |
| REGIONAL ANESTHESIA AND PAIN MEDICINE | 1 | 0.148 |
| RETINAL DEGENERATIVE DISEASES | 1 | 0.148 |
| REVISTA BRASILEIRA DE REUMATOLOGIA | 1 | 0.148 |
| REVISTA DA SOCIEDADE BRASILEIRA DE MEDICINA TROPICAL | 1 | 0.148 |
| RHEUMATOLOGY | 1 | 0.148 |
| RHEUMATOLOGY INTERNATIONAL | 1 | 0.148 |
| SCIENCE SPORTS | 1 | 0.148 |
| SIMULATION IN HEALTHCARE | 1 | 0.148 |
| SKIN RESEARCH AND TECHNOLOGY | 1 | 0.148 |
| SOMATOSENSORY AND MOTOR RESEARCH | 1 | 0.148 |
| SPINAL CORD | 1 | 0.148 |
| SPORTS MEDICINE | 1 | 0.148 |
| STEREOTACTIC AND FUNCTIONAL NEUROSURGERY | 1 | 0.148 |
| SURGERY FOR OBESITY AND RELATED DISEASES | 1 | 0.148 |
| THERAPEUTIC ADVANCES IN ENDOCRINOLOGY AND METABOLISM | 1 | 0.148 |
| TISSUE ENGINEERING OF THE PERIPHERAL NERVE BIOMATERIALS AND PHYSICAL THERAPY | 1 | 0.148 |
| TOHOKU JOURNAL OF EXPERIMENTAL MEDICINE | 1 | 0.148 |
| TOXICOLOGY AND APPLIED PHARMACOLOGY | 1 | 0.148 |
| TRENDS IN ENDOCRINOLOGY AND METABOLISM | 1 | 0.148 |
| TURKISH JOURNAL OF PHYSICAL MEDICINE AND REHABILITATION | 1 | 0.148 |
| UPSALA JOURNAL OF MEDICAL SCIENCES | 1 | 0.148 |
| UROLOGY | 1 | 0.148 |
| WESTERN JOURNAL OF NURSING RESEARCH | 1 | 0.148 |
| WORLD NEUROSURGERY | 1 | 0.148 |
| WORLDVIEWS ON EVIDENCE BASED NURSING | 1 | 0.148 |
| YONSEI MEDICAL JOURNAL | 1 | 0.148 |
| ZOOLOGICAL SCIENCE | 1 | 0.148 |

**Supplementary Table 2**. Raw data on countries/regions involved in exercise and neuropathic pain

| **Countries/Regions** | **Records** | **% of 676** |
| --- | --- | --- |
| USA | 252 | 37.781 |
| BRAZIL | 58 | 8.696 |
| PEOPLES R CHINA | 51 | 7.646 |
| JAPAN | 37 | 5.547 |
| GERMANY | 36 | 5.397 |
| CANADA | 31 | 4.648 |
| ENGLAND | 31 | 4.648 |
| ITALY | 26 | 3.898 |
| TAIWAN | 24 | 3.598 |
| SOUTH KOREA | 23 | 3.448 |
| IRAN | 22 | 3.298 |
| AUSTRALIA | 20 | 2.999 |
| SPAIN | 17 | 2.549 |
| TURKEY | 17 | 2.549 |
| FRANCE | 16 | 2.399 |
| NETHERLANDS | 15 | 2.249 |
| INDIA | 11 | 1.649 |
| SWITZERLAND | 13 | 1.949 |
| DENMARK | 10 | 1.499 |
| BELGIUM | 9 | 1.349 |
| FINLAND | 6 | 0.900 |
| POLAND | 6 | 0.900 |
| SWEDEN | 6 | 0.900 |
| PORTUGAL | 5 | 0.750 |
| SCOTLAND | 5 | 0.750 |
| QATAR | 4 | 0.600 |
| SAUDI ARABIA | 3 | 0.450 |
| CHILE | 3 | 0.450 |
| EGYPT | 3 | 0.450 |
| MEXICO | 3 | 0.450 |
| ROMANIA | 3 | 0.450 |
| SOUTH AFRICA | 3 | 0.450 |
| ESTONIA | 2 | 0.300 |
| IRELAND | 2 | 0.300 |
| NORWAY | 2 | 0.300 |
| PAKISTAN | 2 | 0.300 |
| SINGAPORE | 2 | 0.300 |
| AFGHANISTAN | 1 | 0.150 |
| AUSTRIA | 1 | 0.150 |
| BULGARIA | 1 | 0.150 |
| CYPRUS | 1 | 0.150 |
| CZECH REPUBLIC | 1 | 0.150 |
| GREECE | 1 | 0.150 |
| HUNGARY | 1 | 0.150 |
| ICELAND | 1 | 0.150 |
| INDONESIA | 1 | 0.150 |
| ISRAEL | 1 | 0.150 |
| JORDAN | 1 | 0.150 |
| KENYA | 1 | 0.150 |
| KUWAIT | 1 | 0.150 |
| LITHUANIA | 1 | 0.150 |
| MALAWI | 1 | 0.150 |
| MALAYSIA | 1 | 0.150 |
| MYANMAR | 1 | 0.150 |
| SERBIA | 1 | 0.150 |
| VENEZUELA | 1 | 0.150 |
| WALES | 1 | 0.150 |

**Supplementary Table 3.** Raw data on institutions involved in exercise and neuropathic pain research

| **Institutions** | **Records** | **% of 676** |
| --- | --- | --- |
| UNIV SAO PAULO | 23 | 3.402 |
| EMORY UNIV | 18 | 2.663 |
| UNIV KANSAS | 17 | 2.515 |
| UNIV FED RIO GRANDE DO SUL | 15 | 2.219 |
| CHINA MED UNIV | 11 | 1.627 |
| DREXEL UNIV | 11 | 1.627 |
| NATL CHENG KUNG UNIV | 11 | 1.627 |
| WASHINGTON UNIV | 11 | 1.627 |
| HARVARD UNIV | 10 | 1.479 |
| UNIV PITTSBURGH | 10 | 1.479 |
| UNIV AUTONOMA BARCELONA | 9 | 1.331 |
| UNIV MICHIGAN | 9 | 1.331 |
| EASTERN VIRGINIA MED SCH | 8 | 1.183 |
| MANCHESTER METROPOLITAN UNIV | 8 | 1.183 |
| UNIV BASEL | 8 | 1.183 |
| UNIV CALIF SAN FRANCISCO | 8 | 1.183 |
| WAKAYAMA MED UNIV | 8 | 1.183 |
| CHI MEI MED CTR | 7 | 1.036 |
| UNIV FED SANTA CATARINA | 7 | 1.036 |
| UNIV ROCHESTER | 7 | 1.036 |
| UNIV SYDNEY | 7 | 1.036 |
| GERMAN SPORT UNIV COLOGNE | 6 | 0.888 |
| JOHNS HOPKINS UNIV | 6 | 0.888 |
| LOUISIANA STATE UNIV | 6 | 0.888 |
| MCGILL UNIV | 6 | 0.888 |
| UNIV ALBERTA | 6 | 0.888 |
| UNIV FREIBURG | 6 | 0.888 |
| UNIV IOWA | 6 | 0.888 |
| UNIV MARYLAND | 6 | 0.888 |
| UNIV UTAH | 6 | 0.888 |
| COLUMBIA UNIV | 5 | 0.740 |
| HARVARD MED SCH | 5 | 0.740 |
| MAASTRICHT UNIV | 5 | 0.740 |
| MANIPAL UNIV | 4 | 0.592 |
| OLD DOMINION UNIV | 5 | 0.740 |
| OSAKA YUKIOKA COLL HLTH SCI | 5 | 0.740 |
| SHANGHAI JIAO TONG UNIV | 5 | 0.740 |
| TABRIZ UNIV MED SCI | 5 | 0.740 |
| UNIV ARIZONA | 5 | 0.740 |
| UNIV ESTADO SANTA CATARINA | 5 | 0.740 |
| UNIV HOSP COLOGNE | 5 | 0.740 |
| UNIV MANCHESTER | 5 | 0.740 |
| UNIV MONTREAL | 5 | 0.740 |
| UNIV PENN | 5 | 0.740 |
| UNIV ROMA LA SAPIENZA | 5 | 0.740 |
| CASE WESTERN RESERVE UNIV | 4 | 0.592 |
| CLAYTON STATE UNIV | 4 | 0.592 |
| COLL CHARLESTON | 4 | 0.592 |
| CTR INVEST BIOMED RED ENFERMEDADES NEURODEGENERAT | 4 | 0.592 |
| DUKE UNIV | 4 | 0.592 |
| EDWARD HINES JR VA HOSP | 4 | 0.592 |
| HEIDELBERG UNIV | 4 | 0.592 |
| INSERM | 4 | 0.592 |
| KAROLINSKA INST | 4 | 0.592 |
| LOYOLA UNIV CHICAGO | 4 | 0.592 |
| MAYO CLIN | 4 | 0.592 |
| NIA | 4 | 0.592 |
| OKAYAMA UNIV | 4 | 0.592 |
| STANFORD UNIV | 4 | 0.592 |
| TAIPEI MED UNIV | 4 | 0.592 |
| TARBIAT MODARES UNIV | 4 | 0.592 |
| UNIV BRITISH COLUMBIA | 4 | 0.592 |
| UNIV CALIF LOS ANGELES | 4 | 0.592 |
| UNIV GHENT | 4 | 0.592 |
| UNIV MINNESOTA | 4 | 0.592 |
| UNIV NEWCASTLE | 4 | 0.592 |
| UNIV PADUA | 4 | 0.592 |
| UNIV SOUTHERN SANTA CATARINA | 4 | 0.592 |
| UNIV TEHRAN MED SCI | 4 | 0.592 |
| UNIV WISCONSIN | 4 | 0.592 |
| ZHENGZHOU UNIV | 4 | 0.592 |
| CHENG HSIN GEN HOSP | 3 | 0.444 |
| CLEVELAND CLIN | 3 | 0.444 |
| DEUTSCH SPORTHSCH | 3 | 0.444 |
| ETH | 3 | 0.444 |
| JINAN UNIV | 3 | 0.444 |
| KING KHALID UNIV | 2 | 0.296 |
| KYOTO UNIV | 3 | 0.444 |
| LIVERPOOL JOHN MOORES UNIV | 3 | 0.444 |
| LOMA LINDA UNIV | 3 | 0.444 |
| MASSACHUSETTS GEN HOSP | 3 | 0.444 |
| METAB FITNESS ASSOC | 3 | 0.444 |
| NAGOYA UNIV | 3 | 0.444 |
| NANTONG UNIV | 3 | 0.444 |
| SAHMYOOK UNIV | 3 | 0.444 |
| SHAHID BEHESHTI UNIV MED SCI | 3 | 0.444 |
| ST ANDREA HOSP | 3 | 0.444 |
| SUN YAT SEN UNIV | 3 | 0.444 |
| TAIPEI MED UNIV HOSP | 3 | 0.444 |
| UNIV CINCINNATI | 3 | 0.444 |
| UNIV ESTADUAL CAMPINAS | 3 | 0.444 |
| UNIV GLASGOW | 3 | 0.444 |
| UNIV HELSINKI | 3 | 0.444 |
| UNIV ILLINOIS | 3 | 0.444 |
| UNIV MIAMI | 3 | 0.444 |
| UNIV MISSOURI | 3 | 0.444 |
| UNIV N CAROLINA | 3 | 0.444 |
| UNIV NEW SOUTH WALES | 3 | 0.444 |
| UNIV PORTO | 3 | 0.444 |
| UNIV QUEENSLAND | 3 | 0.444 |
| UNIV SOUTHERN DENMARK | 3 | 0.444 |
| UNIV TEXAS | 3 | 0.444 |
| UNIV TEXAS TYLER | 3 | 0.444 |
| UNIV TORONTO | 3 | 0.444 |
| UNIV VIRGINIA | 3 | 0.444 |
| UNIV WASHINGTON | 3 | 0.444 |
| UNIV ZURICH | 3 | 0.444 |
| YONSEI UNIV | 3 | 0.444 |
| AALBORG UNIV | 2 | 0.296 |
| AARHUS UNIV HOSP | 2 | 0.296 |
| BROWN UNIV | 2 | 0.296 |
| CHANG GUNG MEM HOSP | 2 | 0.296 |
| CHENG CHING GEN HOSP | 2 | 0.296 |
| CHIA NAN UNIV PHARM SCI | 2 | 0.296 |
| CHONBUK NATL UNIV | 2 | 0.296 |
| COPENHAGEN UNIV HOSP | 2 | 0.296 |
| DANA FARBER CANC INST | 2 | 0.296 |
| DARTMOUTH COLL SCH MED | 2 | 0.296 |
| DEPT FISIOTERAPIA FONOAUDIOL TERAPIA OCUPAC | 2 | 0.296 |
| EHIME UNIV | 2 | 0.296 |
| ERASMUS MC | 2 | 0.296 |
| FORO ITALICO UNIV | 2 | 0.296 |
| FUDAN UNIV | 2 | 0.296 |
| FUKUSHIMA MED UNIV | 2 | 0.296 |
| GEORGIA INST TECHNOL | 2 | 0.296 |
| GERMAN CANC RES CTR | 2 | 0.296 |
| GETTYSBURG COLL | 2 | 0.296 |
| GREENVILLE NCORP | 2 | 0.296 |
| HACETTEPE UNIV | 2 | 0.296 |
| HARBIN MED UNIV | 2 | 0.296 |
| HASSELT UNIV | 2 | 0.296 |
| HAWAII NCORP | 2 | 0.296 |
| HEILONGJIANG UNIV CHINESE MED | 2 | 0.296 |
| HENAN UNIV | 2 | 0.296 |
| HOSHI UNIV | 2 | 0.296 |
| HOSP CLIN PORTO ALEGRE | 2 | 0.296 |
| HUBEI UNIV MED | 2 | 0.296 |
| INDIA DIABET RES FDN | 2 | 0.296 |
| INDIANA UNIV | 2 | 0.296 |
| INJE UNIV | 2 | 0.296 |
| ISLAMIC AZAD UNIV | 2 | 0.296 |
| KATHOLIEKE UNIV LEUVEN | 2 | 0.296 |
| KEIO UNIV | 2 | 0.296 |
| KINGS COLL LONDON | 2 | 0.296 |
| KONYANG UNIV | 2 | 0.296 |
| LEIDEN UNIV | 2 | 0.296 |
| LORESTAN UNIV | 2 | 0.296 |
| MAINE MED CTR | 2 | 0.296 |
| MARQUETTE UNIV | 2 | 0.296 |
| MASHHAD UNIV MED SCI | 2 | 0.296 |
| MAXIMA MED CTR | 2 | 0.296 |
| METABOL FITNESS ASSOC | 2 | 0.296 |
| MICHIGAN STATE UNIV | 2 | 0.296 |
| MINIST HLTH | 2 | 0.296 |
| MONASH UNIV | 2 | 0.296 |
| NANJING MED UNIV | 2 | 0.296 |
| NANJING UNIV | 2 | 0.296 |
| NATL CHUNG HSING UNIV | 2 | 0.296 |
| NATL CTR COMPLEMENTARY INTEGRAT HLTH | 2 | 0.296 |
| NATL CTR TUMOR DIS NCT | 2 | 0.296 |
| NATL HOSP NEUROL NEUROSURG | 2 | 0.296 |
| NATL YANG MING UNIV | 2 | 0.296 |
| NIKE SPORTS RES LAB | 2 | 0.296 |
| NO ARIZONA UNIV | 2 | 0.296 |
| OHIO STATE UNIV | 2 | 0.296 |
| PAMUKKALE UNIV | 2 | 0.296 |
| PENN STATE COLL MED | 2 | 0.296 |
| PFIZER GLOBAL RES DEV | 2 | 0.296 |
| QUEENS UNIV | 2 | 0.296 |
| QUEENSLAND UNIV TECHNOL | 2 | 0.296 |
| ROYAL PRINCE ALFRED HOSP | 2 | 0.296 |
| RUTGERS STATE UNIV | 2 | 0.296 |
| SAITAMA MED UNIV | 2 | 0.296 |
| SECOND MIL MED UNIV | 2 | 0.296 |
| SEMNAN UNIV MED SCI | 2 | 0.296 |
| SEOUL NATL UNIV | 2 | 0.296 |
| SHAHID BEHESHTI UNIV | 2 | 0.296 |
| SHANGHAI UNIV SPORT | 2 | 0.296 |
| SO GEN HOSP | 2 | 0.296 |
| SOUTHEAST UNIV | 2 | 0.296 |
| STAFFORDSHIRE UNIV | 2 | 0.296 |
| STATE UNIV CAMPINAS UNICAMP | 2 | 0.296 |
| STATE UNIV WESTERN PARANA UNIOESTE | 2 | 0.296 |
| TABRIZ UNIV | 2 | 0.296 |
| TAICHUNG VET GEN HOSP | 2 | 0.296 |
| TEXAS A M UNIV | 2 | 0.296 |
| TEXAS TECH UNIV | 2 | 0.296 |
| TUFTS UNIV | 2 | 0.296 |
| UNIV ANDRES BELLO | 2 | 0.296 |
| UNIV BOLOGNA | 2 | 0.296 |
| UNIV CAGLIARI | 2 | 0.296 |
| UNIV CALIF SAN DIEGO | 2 | 0.296 |
| UNIV COLOGNE | 2 | 0.296 |
| UNIV COLORADO | 2 | 0.296 |
| UNIV CONCEPCION | 2 | 0.296 |
| UNIV COPENHAGEN | 2 | 0.296 |
| UNIV DUSSELDORF | 2 | 0.296 |
| UNIV EDINBURGH | 2 | 0.296 |
| UNIV ESTADUAL PIAUI | 2 | 0.296 |
| UNIV FED AMAPA | 2 | 0.296 |
| UNIV FED ESPIRITO SANTO | 2 | 0.296 |
| UNIV FED SAO CARLOS | 2 | 0.296 |
| UNIV FED SAO PAULO | 2 | 0.296 |
| UNIV FLORIDA | 2 | 0.296 |
| UNIV G DANNUNZIO | 2 | 0.296 |
| UNIV GEORGIA | 2 | 0.296 |
| UNIV HONG KONG | 2 | 0.296 |
| UNIV HOSP | 2 | 0.296 |
| UNIV HOSP BASEL | 2 | 0.296 |
| UNIV HOSP CTR | 2 | 0.296 |
| UNIV IBIRAPUERA | 2 | 0.296 |
| UNIV KIEL | 2 | 0.296 |
| UNIV KWAZULU NATAL | 2 | 0.296 |
| UNIV LOUISVILLE | 2 | 0.296 |
| UNIV MANITOBA | 2 | 0.296 |
| UNIV MILAN | 2 | 0.296 |
| UNIV NEW ENGLAND | 2 | 0.296 |
| UNIV NEW S WALES | 2 | 0.296 |
| UNIV OXFORD | 2 | 0.296 |
| UNIV PAVIA | 2 | 0.296 |
| UNIV S FLORIDA | 2 | 0.296 |
| UNIV SAO JUDAS TADEU | 2 | 0.296 |
| UNIV SEVILLE | 2 | 0.296 |
| UNIV ST ETIENNE | 2 | 0.296 |
| UNIV TEXAS DALLAS | 2 | 0.296 |
| UNIV TEXAS MD ANDERSON CANC CTR | 2 | 0.296 |
| UNIV TEXAS MED BRANCH | 2 | 0.296 |
| UNIV TEXAS SW MED CTR DALLAS | 2 | 0.296 |
| UNIV TRAS OS MONTES ALTO DOURO | 2 | 0.296 |
| UNIV TSUKUBA | 2 | 0.296 |
| UNIV ULSAN | 2 | 0.296 |
| UNIV WESTERN AUSTRALIA | 2 | 0.296 |
| VIECURI MED CTR | 2 | 0.296 |
| WICHITA NCI COMMUNITY ONCOL RES PROGRAM NCORP | 2 | 0.296 |
| WRIGHT STATE UNIV | 2 | 0.296 |
| XI AN JIAO TONG UNIV | 2 | 0.296 |
| YORK UNIV | 2 | 0.296 |
| 3 MED REGIMENT | 1 | 0.148 |
| 3RD HOSP HEBEI MED UNIV | 1 | 0.148 |
| 3S PHARMACOL CONSULTAT RES GMBH | 1 | 0.148 |
| 3S PHARMACOL CONSULTAT RES SRL | 1 | 0.148 |
| A SEGNI HOSP ASL 1 | 1 | 0.148 |
| AACD | 1 | 0.148 |
| AARHUS UNIV | 1 | 0.148 |
| AASDAP | 1 | 0.148 |
| ABBOTT LABS | 1 | 0.148 |
| ACES DOURO I MARAO DOURO NORTE | 1 | 0.148 |
| ADELANTE REHABIL | 1 | 0.148 |
| ADIR ASSOC | 1 | 0.148 |
| ADNAN MENDERES UNIV | 1 | 0.148 |
| ADOLOR CORP | 1 | 0.148 |
| ADV BION BOSTON SCI | 1 | 0.148 |
| AGEING SECT | 1 | 0.148 |
| AGRI STATE HOSP | 1 | 0.148 |
| AICHI GAKUIN UNIV | 1 | 0.148 |
| AIN SHAMS UNIV HOSP | 1 | 0.148 |
| ALBORZ UNIV MED SCI | 1 | 0.148 |
| ALFRED HOSP | 1 | 0.148 |
| ALGEMEEN ZIEKENHUIS JAN PALFIJN | 1 | 0.148 |
| ALL INDIA INST MED SCI | 1 | 0.148 |
| ALLAMEH TABATABAI UNIV | 1 | 0.148 |
| AMER ASSOC HOMES SERV AGING | 1 | 0.148 |
| AMER CANC SOC | 1 | 0.148 |
| AMER CHRON PAIN ASSOC | 1 | 0.148 |
| AMITY UNIV UP | 1 | 0.148 |
| AMRITA VISHWA VIDYAPEETHAM | 1 | 0.148 |
| AMSTERDAM MOVEMENT SCI | 1 | 0.148 |
| AMSTERDAM REHABIL RES CTR READE | 1 | 0.148 |
| ANALGES CONCEPTS | 1 | 0.148 |
| ANALGES SOLUT | 1 | 0.148 |
| ANKARA EDUC RES HOSP | 1 | 0.148 |
| APOLLO HOSP | 1 | 0.148 |
| ASAHIKAWA MED UNIV | 1 | 0.148 |
| ATHABASCA UNIV | 1 | 0.148 |
| ATLANTA VA MED CTR | 1 | 0.148 |
| AUSTRALIAN CATHOLIC UNIV | 1 | 0.148 |
| AXIAL CTR IMAGEM | 1 | 0.148 |
| AXXON BELGIAN PHYS THERAPY ASSOC | 1 | 0.148 |
| AZAD UNIV | 1 | 0.148 |
| BALGRIST UNIV HOSP | 1 | 0.148 |
| BANI SUEF UNIV HOSP | 1 | 0.148 |
| BASKENT UNIV | 1 | 0.148 |
| BAYER HEALTHCARE PHARMACEUT | 1 | 0.148 |
| BAYER PHARMA AG | 1 | 0.148 |
| BAYLOR COLL MED | 1 | 0.148 |
| BEGIN HOSP | 1 | 0.148 |
| BEIHANG UNIV | 1 | 0.148 |
| BEIJING GERIATR HOSP | 1 | 0.148 |
| BEIJING UNIV CHINESE MED | 1 | 0.148 |
| BELLARMINE UNIV | 1 | 0.148 |
| BELLEVILLE MEM HOSP | 1 | 0.148 |
| BETH ISRAEL DEACONESS MED CTR | 1 | 0.148 |
| BIOSTAT HLTH TECHNOL ASSESSMENT | 1 | 0.148 |
| BIOTEST UK LTD | 1 | 0.148 |
| BOSTON CHILDRENS HOSP | 1 | 0.148 |
| BRIGHAM WOMENS HOSP | 1 | 0.148 |
| BRIGHAM YOUNG UNIV | 1 | 0.148 |
| BRITISH COLUMBIA CANC | 1 | 0.148 |
| BRITISH COLUMBIA CANC AGCY | 1 | 0.148 |
| BROCK UNIV | 1 | 0.148 |
| BUDDHIST TZU CHI MED FDN | 1 | 0.148 |
| BULGARIAN ACAD SCI | 1 | 0.148 |
| BURHANIYE STATE HOSP BALIKESIR | 1 | 0.148 |
| CA FONCELLO HOSP | 1 | 0.148 |
| CAIRO UNIV | 1 | 0.148 |
| CAIRO UNIV HOSP | 1 | 0.148 |
| CALVARY MATER NEWCASTLE HOSP | 1 | 0.148 |
| CANC CARE ONTARIO | 1 | 0.148 |
| CANC FDN LIFE | 1 | 0.148 |
| CANISIUS WILHELMINA HOSP | 1 | 0.148 |
| CAPHRI RES SCH | 1 | 0.148 |
| CAPITAL MED UNIV | 1 | 0.148 |
| CAROL DAVILA UNIV MED PHARM | 1 | 0.148 |
| CAROLINAS REHABIL | 1 | 0.148 |
| CATHARINA CANC CTR | 1 | 0.148 |
| CATHAY GEN HOSP | 1 | 0.148 |
| CELAL BAYAR UNIV | 1 | 0.148 |
| CENT MANCHESTER NHS FDN TRUST | 1 | 0.148 |
| CENT MANCHESTER UNIV HOSP NHS FDN TRUST | 1 | 0.148 |
| CHA UNIV | 1 | 0.148 |
| CHANG GUNG MEM HOSP LINKOU | 1 | 0.148 |
| CHANG GUNG UNIV | 1 | 0.148 |
| CHANG GUNG UNIV SCI TECHNOL | 1 | 0.148 |
| CHARLES DARWIN UNIV | 1 | 0.148 |
| CHARLES UNIV PRAGUE | 1 | 0.148 |
| CHIBA UNIV | 1 | 0.148 |
| CHILDRENS HOSP | 1 | 0.148 |
| CHINA ACAD CHINESE MED SCI | 1 | 0.148 |
| CHINA NORMAL UNIV | 1 | 0.148 |
| CHINA PEOPLES POLICE UNIV | 1 | 0.148 |
| CHINESE ACAD SCI | 1 | 0.148 |
| CHINESE PEOPLES LIBERAT ARMY GEN HOSP | 1 | 0.148 |
| CHONBUK NATL UNIV MED SCH HOSP | 1 | 0.148 |
| CHRIS OBRIEN LIFEHOUSE | 1 | 0.148 |
| CHRISTINA HOSP | 1 | 0.148 |
| CHRON PAIN RES ALLIANCE | 1 | 0.148 |
| CHU CLERMONT FERRAND | 1 | 0.148 |
| CHUBU UNIV | 1 | 0.148 |
| CHUNG HWA UNIV MED TECHNOL | 1 | 0.148 |
| CHUNGBUK NATL UNIV | 1 | 0.148 |
| CHUNGBUK NATL UNIV HOSP | 1 | 0.148 |
| CHUNGNAM NATL UNIV | 1 | 0.148 |
| CIMI UPMC | 1 | 0.148 |
| CINCINNATI CHILDRENS HOSP MED CTR | 1 | 0.148 |
| CINVESTAV | 1 | 0.148 |
| CITE CTR INNOVAT TECHNOL EDUC | 1 | 0.148 |
| CITTADELLA HOSP | 1 | 0.148 |
| CITY UNIV LONDON | 1 | 0.148 |
| CLEVELAND CLIN FDN | 1 | 0.148 |
| CNR | 1 | 0.148 |
| CNRS | 1 | 0.148 |
| COLL OSTEOPATH MED | 1 | 0.148 |
| COLLEGIUM PHARMACEUT INC | 1 | 0.148 |
| CONSORZIO MARIO NEGRI SUD | 1 | 0.148 |
| COPENHAGEN UNIV HOSP HERLEV | 1 | 0.148 |
| COUNCIL RES CTR | 1 | 0.148 |
| COVENTRY UNIV | 1 | 0.148 |
| CTR ADDICT MENTAL HLTH | 1 | 0.148 |
| CTR HOSP TONDELA VISEU | 1 | 0.148 |
| CTR HOSP UNIV BORDEAUX | 1 | 0.148 |
| CTR INTERDISCIPLINAIRE RECH READAPTAT INTEGRAT | 1 | 0.148 |
| CTR JEAN PERRIN | 1 | 0.148 |
| CTR NATL RECH SCI | 1 | 0.148 |
| CTR OUTCOMES RES CLIN EPIDEMIOL CORESEARCH | 1 | 0.148 |
| CURTIN UNIV | 1 | 0.148 |
| CYPRESS BIOSCI INC | 1 | 0.148 |
| DA YEH UNIV | 1 | 0.148 |
| DAEGU HAANY UNIV | 1 | 0.148 |
| DAEGU UNIV | 1 | 0.148 |
| DAEJEON UNIV | 1 | 0.148 |
| DAIICHI COLL PHARMACEU SCI | 1 | 0.148 |
| DALHOUSIE UNIV | 1 | 0.148 |
| DANISH CANC SOC | 1 | 0.148 |
| DANISH CANC SOC RES CTR | 1 | 0.148 |
| DAQING LONGNAN HOSP | 1 | 0.148 |
| DAQING OIL FIELD GEN HOSP | 1 | 0.148 |
| DE HOOGSTRAAT REHABIL UTRECHT | 1 | 0.148 |
| DEF PRIMARY CARE REHABIL FACIL | 1 | 0.148 |
| DELLON INST PERIPHERAL NERVE SURG | 1 | 0.148 |
| DEPT ANESTHESIOL | 1 | 0.148 |
| DEPT KINESIOL PHYS EDUC | 1 | 0.148 |
| DEPT MED RES | 1 | 0.148 |
| DEPT PHYS THERAPY | 1 | 0.148 |
| DEPT PSYCHIAT | 1 | 0.148 |
| DEPT VET AFFAIRS | 1 | 0.148 |
| DES MOINES UNIV | 1 | 0.148 |
| DESJARDINS ASSOCIATES | 1 | 0.148 |
| DONG A UNIV | 1 | 0.148 |
| DR RAMACHANDRANS DIABET HOSP | 1 | 0.148 |
| DUTCH INST ALLIED HLTH CARE | 1 | 0.148 |
| E DA HOSP | 1 | 0.148 |
| ECOLE POLYTECH FED LAUSANNE | 1 | 0.148 |
| EDMOND LILY SAFRA INT INST NEUROSCI | 1 | 0.148 |
| EHIME UNIV HOSP | 1 | 0.148 |
| ELI LILLY CO | 1 | 0.148 |
| ENDOCRINOL METAB RES INST | 1 | 0.148 |
| EOTVOS LORAND UNIV | 1 | 0.148 |
| EPICENTRE | 1 | 0.148 |
| EPICURA HOSP | 1 | 0.148 |
| ESCOLA EDUC FIS EXERCITO BRASILEIRO | 1 | 0.148 |
| ESKISEHIR OSMANGAZI UNIV | 1 | 0.148 |
| ESTEVE | 1 | 0.148 |
| ETHZ UNIZH | 1 | 0.148 |
| EVIDERA | 1 | 0.148 |
| EVOLVE RESTORAT CTR | 1 | 0.148 |
| EWHA WOMANS UNIV | 1 | 0.148 |
| EXPONENT INC | 1 | 0.148 |
| EYE EAR INST | 1 | 0.148 |
| FAC HLTH MED LIFE SCI | 1 | 0.148 |
| FAC MED PHARM | 1 | 0.148 |
| FAC MED RIBEIRAO PRETO | 1 | 0.148 |
| FAC VET MED | 1 | 0.148 |
| FATIH UNIV | 1 | 0.148 |
| FDN IRCCS CA GRANDA OSPED MAGGIORE POLICLIN | 1 | 0.148 |
| FDN SALVATORE MAUGERI IRCCS | 1 | 0.148 |
| FED INST EDUC SCI TECHNOL GOIAS | 1 | 0.148 |
| FED INST SANTA CATARINA | 1 | 0.148 |
| FED UNIV ABC | 1 | 0.148 |
| FERDOWSI UNIV MASHHAD | 1 | 0.148 |
| FERRARA UNIV | 1 | 0.148 |
| FONTYS UNIV APPL SCI | 1 | 0.148 |
| FREE UNIV AMSTERDAM | 1 | 0.148 |
| FRIEDRICH MIESCHER INST | 1 | 0.148 |
| FU JEN CATHOLIC UNIV | 1 | 0.148 |
| FUNDACAO OSWALDO CRUZ | 1 | 0.148 |
| FUNDACAO UNIV CARDIOL PORTO ALEGRE | 1 | 0.148 |
| FUNDACITE ZULIA | 1 | 0.148 |
| GACHON UNIV MED SCI | 1 | 0.148 |
| GEISINGER COMMUNITY MED CTR | 1 | 0.148 |
| GEISINGER WYOMING VALLEY MED CTR | 1 | 0.148 |
| GEN HOSP CHINESE PLA | 1 | 0.148 |
| GENECODE LTD | 1 | 0.148 |
| GEORGE MASON UNIV | 1 | 0.148 |
| GEORGE WASHINGTON UNIV | 1 | 0.148 |
| GEORGIA SO UNIV | 1 | 0.148 |
| GERMAN SPORTS UNIV | 1 | 0.148 |
| GERMAN SPORTS UNIV COLOGNE | 1 | 0.148 |
| GETULIO VARGAS HOSP | 1 | 0.148 |
| GIANNETTASIO HOSP | 1 | 0.148 |
| GIFU UNIV | 1 | 0.148 |
| GIMCHEON UNIV | 1 | 0.148 |
| GLASGOW CALEDONIAN UNIV | 1 | 0.148 |
| GOETHE UNIV FRANKFURT | 1 | 0.148 |
| GREENVILLE HLTH SYST | 1 | 0.148 |
| GRP HOSP PITIE SALPETRIERE | 1 | 0.148 |
| GRUNENTHAL GMBH | 1 | 0.148 |
| GUANGDONG INST APPL BIOL RESOURCES | 1 | 0.148 |
| GUANGDONG MED COLL | 1 | 0.148 |
| GUANGDONG PUBL LAB WILD ANIM CONSERVAT UTILIZAT | 1 | 0.148 |
| GUANGDONG UNIV BUSINESS STUDIES | 1 | 0.148 |
| GULHANE MIL MED ACAD | 1 | 0.148 |
| HAMAD MED CO | 1 | 0.148 |
| HAN NAM UNIV | 1 | 0.148 |
| HANNOVER MED SCH | 1 | 0.148 |
| HARVARD BETH ISRAEL DEACONESS MED CTR | 1 | 0.148 |
| HEIDELBERG UNIV CLIN | 1 | 0.148 |
| HEM ONC CLIN | 1 | 0.148 |
| HENAN VOCAT COLL LIGHT IND | 1 | 0.148 |
| HLTH NURSING FACIL AGED | 1 | 0.148 |
| HLTH SCI UNIV | 1 | 0.148 |
| HOAG HOSP | 1 | 0.148 |
| HOKKAIDO PHARMACEUT UNIV | 1 | 0.148 |
| HONG KONG POLYTECH UNIV | 1 | 0.148 |
| HOP ERASME | 1 | 0.148 |
| HOP ST JUSTINE | 1 | 0.148 |
| HOP UNIV GENEVE | 1 | 0.148 |
| HOP UNIV HENRI MONDOR | 1 | 0.148 |
| HOP UNIV STRASBOURG | 1 | 0.148 |
| HOSP AMADORA SINTRA | 1 | 0.148 |
| HOSP GETULIO VARGAS | 1 | 0.148 |
| HOSP NACL PARAPLEJICOS | 1 | 0.148 |
| HOSP ORTOPED LIFECTR | 1 | 0.148 |
| HOSP SANTO ANTONIO | 1 | 0.148 |
| HOSP SAO FRANCISCO DE ASSIS | 1 | 0.148 |
| HOSP SICK CHILDREN | 1 | 0.148 |
| HOSP UNIV PUERTA DE HIERRO | 1 | 0.148 |
| HOSP UNIV RAMON Y CAJAL | 1 | 0.148 |
| HPP UNIV PITIE SALPETRIERE CHARLES FOIX | 1 | 0.148 |
| HSR D RR D CTR INNOVAT DISABIL REHABIL RES CIND | 1 | 0.148 |
| HUAZHONG UNIV SCI TECHNOL | 1 | 0.148 |
| HUNGARIAN ACAD SCI | 1 | 0.148 |
| HYOGO COLL MED | 1 | 0.148 |
| I SHOU UNIV | 1 | 0.148 |
| IMPERIAL COLL LONDON | 1 | 0.148 |
| INDIAN COUNCIL MED RES | 1 | 0.148 |
| INDIANA STATE UNIV | 1 | 0.148 |
| INDIANA UNIV SCH MED | 1 | 0.148 |
| INESC TEC | 1 | 0.148 |
| INHA UNIV | 1 | 0.148 |
| INKOSI ALBERT LUTHULI CENT HOSP | 1 | 0.148 |
| INONU UNIV | 1 | 0.148 |
| INOVA FAIRFAX MED CAMPUS | 1 | 0.148 |
| INST BIOCYBERNET BIOMED ENGN | 1 | 0.148 |
| INST BIOMOL CHEM | 1 | 0.148 |
| INST BRASILEIRO TECNOL CALCADO IBTEC | 1 | 0.148 |
| INST CELLULAR BIOL PATHOL N SIMIONESCU | 1 | 0.148 |
| INST DIABET NUTR METAB DIS PROF NC PAULESCU | 1 | 0.148 |
| INST MYOL | 1 | 0.148 |
| INST NEUROL CURITIBA | 1 | 0.148 |
| INST NEUROSCI MONTPELLIER | 1 | 0.148 |
| INST PSYCHOSOCIAL MED | 1 | 0.148 |
| INTERMT HEALTHCARE | 1 | 0.148 |
| IOWA STATE UNIV | 1 | 0.148 |
| IPSWICH HOSP | 1 | 0.148 |
| IRAN UNIV MED SCI | 1 | 0.148 |
| IRCCS SAN RAFFAELE SCI INST | 1 | 0.148 |
| ISALA | 1 | 0.148 |
| ISIC | 1 | 0.148 |
| IST SCI SAN RAFFAELE | 1 | 0.148 |
| ISTANBUL FIZIK TEDAVI REHABIL EGITIM ARASTIRM | 1 | 0.148 |
| ISTANBUL MEDENIYET UNIV | 1 | 0.148 |
| ISTANBUL PHYS THERAPY REHABIL TRAINING RES HO | 1 | 0.148 |
| ISTANBUL TRAINING RES HOSP | 1 | 0.148 |
| ITALIAN NATL INST HLTH | 1 | 0.148 |
| IULIU HATIEGAN UNIV MED PHARM | 1 | 0.148 |
| IULIU HATIEGANU UNIV MED PHARM | 1 | 0.148 |
| IWKHLTH CTR | 1 | 0.148 |
| JAMES A HALEY VA HOSP | 1 | 0.148 |
| JAMES A HALEY VET HOSP | 1 | 0.148 |
| JAMES COOK UNIV | 1 | 0.148 |
| JAPAN TOBACCO INC | 1 | 0.148 |
| JAZZ PHARMACEUT | 1 | 0.148 |
| JD UNIV | 1 | 0.148 |
| JESSA HOSP | 1 | 0.148 |
| JIANGSU LAKE TAIHU CADRES SANAT JIANGSU PROV PEOP | 1 | 0.148 |
| JICHI MED UNIV | 1 | 0.148 |
| JILIN UNIV | 1 | 0.148 |
| JOHN HUNTER HOSP | 1 | 0.148 |
| JOHNS HOPKINS MED INST | 1 | 0.148 |
| JOHNS HOPKINS UNIV HOSP | 1 | 0.148 |
| JOHNSON JOHNSON | 1 | 0.148 |
| JORDAN UNIV SCI TECHNOL | 1 | 0.148 |
| JOZEF PILSUDSKI UNIV PHYS EDUC | 1 | 0.148 |
| JYVASKYLA CENT HOSP | 1 | 0.148 |
| KABUL UNIV | 1 | 0.148 |
| KAGOSHIMA UNIV | 1 | 0.148 |
| KANGWON NATL UNIV | 1 | 0.148 |
| KANSAI UNIV WELF SCI | 1 | 0.148 |
| KARADENIZ TECH UNIV | 1 | 0.148 |
| KARAMAN STATE HOSP | 1 | 0.148 |
| KARAPMAR STATE HOSP | 1 | 0.148 |
| KAROL MARCINKOWSKI MED UNIV | 1 | 0.148 |
| KAROL MARCINKOWSKI UNIV MED | 1 | 0.148 |
| KASTURBA MED COLL HOSP | 1 | 0.148 |
| KAWASAKI MED SCH NEPHROL HYPERTENS | 1 | 0.148 |
| KEIO UNIV MED | 1 | 0.148 |
| KENYA GOVT MED RES CTR | 1 | 0.148 |
| KERMAN UNIV MED SCI | 1 | 0.148 |
| KEY ORTHOPAED BIOMECH LAB HEBEI PROV | 1 | 0.148 |
| KHARAZMI UNIV | 1 | 0.148 |
| KHOO TECK PUAT HOSP | 1 | 0.148 |
| KING SAUD UNIV | 1 | 0.148 |
| KINGS COLL HOSP LONDON | 1 | 0.148 |
| KIRISHIMA ORTHOPED | 1 | 0.148 |
| KLEU INST PHYSIOTHERAPY | 1 | 0.148 |
| KLINIKUM GOETHE UNIV FRANKFURT | 1 | 0.148 |
| KLINIKUM STUTTGART | 1 | 0.148 |
| KOBE UNIV | 1 | 0.148 |
| KOCHI MEM HOSP | 1 | 0.148 |
| KOKILABEN DHIRUNBHAI AMBANI HOSP | 1 | 0.148 |
| KONYA TRAINING RES HOSP | 1 | 0.148 |
| KOREA UNIV | 1 | 0.148 |
| KRANKENHAUS NW FRANKFURT | 1 | 0.148 |
| KUMAMOTO UNIV | 1 | 0.148 |
| KUNMING TONGREN HOSP | 1 | 0.148 |
| KUOPIO UNIV HOSP | 1 | 0.148 |
| KURUME UNIV | 1 | 0.148 |
| KUWAIT INST MED SPECIALIZAT | 1 | 0.148 |
| KYORITSU UNIV PHARM | 1 | 0.148 |
| KYUNG HEE UNIV | 1 | 0.148 |
| KYUNGDONG UNIV | 1 | 0.148 |
| LA TROBE UNIV | 1 | 0.148 |
| LANCASHIRE TEACHING HOSP | 1 | 0.148 |
| LANGSTON UNIV | 1 | 0.148 |
| LIFE AFTER WEIGHT LOSS CTR | 1 | 0.148 |
| LIFE SCI TOKYO ADV RES CTR | 1 | 0.148 |
| LIFEQUEST NURSING CTR | 1 | 0.148 |
| LILLY USA LLC | 1 | 0.148 |
| LITHUANIAN UNIV HLTH SCI | 1 | 0.148 |
| LONDON SCH HYG TROP MED | 1 | 0.148 |
| LORA GRP LLC | 1 | 0.148 |
| LORESTAN UNIV MED SCI | 1 | 0.148 |
| LOUIS STOKES CLEVELAND VET AFFAIRS MED CTR | 1 | 0.148 |
| LOYOLA MARYMOUNT UNIV | 1 | 0.148 |
| LUHS | 1 | 0.148 |
| M NENCKI INST EXPT BIOL | 1 | 0.148 |
| MADOU SIN LAU HOSP | 1 | 0.148 |
| MALAWI LIVERPOOL WELLCOME TRUST RES PROGRAMME | 1 | 0.148 |
| MALCOM RANDALL VA MED CTR | 1 | 0.148 |
| MARKUS HOSP | 1 | 0.148 |
| MASSACHUSETTS HOSP | 1 | 0.148 |
| MATSUYAMA UNIV | 1 | 0.148 |
| MCGILL UNIV HLTH CTR | 1 | 0.148 |
| MCLEAN HOSP | 1 | 0.148 |
| MD ANDERSON CANC CTR | 1 | 0.148 |
| MED CTR HAAGLANDEN | 1 | 0.148 |
| MED UNIV LODZ | 1 | 0.148 |
| MED UNIV VIENNA | 1 | 0.148 |
| MEDIMMUNE LTD | 1 | 0.148 |
| MEDOCHEMIE LTD | 1 | 0.148 |
| METABOL FITNESS ASSOC MONTEROTONDO | 1 | 0.148 |
| MIAMI VA MED CTR | 1 | 0.148 |
| MIDWESTERN UNIV | 1 | 0.148 |
| MIN HWEI COLL HLTH CARE MANAGEMENT | 1 | 0.148 |
| MINIST INTERIOR ADM WARSAW | 1 | 0.148 |
| MINNESOTA ONC HEM | 1 | 0.148 |
| MIT | 1 | 0.148 |
| MONTREAL GEN HOSP | 1 | 0.148 |
| MOORFIELDS EYE HOSP NHS FDN TRUST | 1 | 0.148 |
| MT SINAI SCH MED | 1 | 0.148 |
| MURDOCH UNIV | 1 | 0.148 |
| MUSTAFA KEMAL UNIV | 1 | 0.148 |
| N FLORIDA S GEORGIA VET HLTH SYST | 1 | 0.148 |
| NAGASAKI UNIV | 1 | 0.148 |
| NAGOYA UNIV HOSP | 1 | 0.148 |
| NANJING CENT HOSP | 1 | 0.148 |
| NAT ALTERNAT INT | 1 | 0.148 |
| NATL CHENG KUNG UNIV HOSP | 1 | 0.148 |
| NATL CHILDRENS HOSP | 1 | 0.148 |
| NATL DEF MED COLL | 1 | 0.148 |
| NATL DEF MED CTR | 1 | 0.148 |
| NATL HLTH INSURANCE CORP ILSAN HOSP | 1 | 0.148 |
| NATL HOSP ORG | 1 | 0.148 |
| NATL INST BASIC BIOL | 1 | 0.148 |
| NATL INST ENVIRONM STUDIES | 1 | 0.148 |
| NATL INST MENTAL HLTH NEUROSCI | 1 | 0.148 |
| NATL INST MINAMATA DIS | 1 | 0.148 |
| NATL MATERN HOSP | 1 | 0.148 |
| NATL NAVAL MED CTR | 1 | 0.148 |
| NATL TAICHUNG UNIV SCI TECHNOL | 1 | 0.148 |
| NATL TAIPEI UNIV TECHNOL | 1 | 0.148 |
| NATL TAIWAN UNIV | 1 | 0.148 |
| NATL TRANSPORT HOSP TZAR BORIS III | 1 | 0.148 |
| NATL UNIV HLTH SYST | 1 | 0.148 |
| NATL UNIV SINGAPORE | 1 | 0.148 |
| NCI | 1 | 0.148 |
| NED UNIV ENGN TECHNOL | 1 | 0.148 |
| NETHERLANDS CANC INST | 1 | 0.148 |
| NETHERLANDS CANC REGISTRY | 1 | 0.148 |
| NEUROCRINE BIOSCI | 1 | 0.148 |
| NEUROMUSCULAR CTR NIJMEGEN | 1 | 0.148 |
| NEUROSCI RES AUSTRALIA | 1 | 0.148 |
| NEW ENGLAND RES INST INC | 1 | 0.148 |
| NG TENG FONG GEN HOSP | 1 | 0.148 |
| NHMRC NATL CTR RES EXCELLENCE PERIPHERAL ARTERIAL | 1 | 0.148 |
| NIAAA | 1 | 0.148 |
| NIDA | 1 | 0.148 |
| NIH | 1 | 0.148 |
| NIHON PHARMACEU UNIV | 1 | 0.148 |
| NIHON UNIV | 1 | 0.148 |
| NIPPON CHEMIPHAR CO LTD | 1 | 0.148 |
| NORFOLK NORWICH UNIV HOSP NHS FDN TRUST | 1 | 0.148 |
| NORFOLK STATE UNIV | 1 | 0.148 |
| NORMANDIE UNIV | 1 | 0.148 |
| NORTH KHORASAN UNIV MED SCI | 1 | 0.148 |
| NORTHWESTERN HLTH SCI UNIV | 1 | 0.148 |
| NORTHWESTERN UNIV | 1 | 0.148 |
| NORWEGIAN SCH SPORT SCI | 1 | 0.148 |
| NORWEGIAN UNIV SCI TECHNOL | 1 | 0.148 |
| NOTRE DAME UNIV | 1 | 0.148 |
| NOVOTEC MED GMBH | 1 | 0.148 |
| NUCITEC SA CV QUERETARO | 1 | 0.148 |
| NYU | 1 | 0.148 |
| OCTOBER 6 UNIV | 1 | 0.148 |
| OKAYAMA UNIV SCI | 1 | 0.148 |
| ONDOKUZ MAYIS UNIV | 1 | 0.148 |
| ONYX PHARMACEUT INC | 1 | 0.148 |
| OREGON HLTH SCI UNIV | 1 | 0.148 |
| ORION CORP ORION PHARMA | 1 | 0.148 |
| OSAKA MED COLL | 1 | 0.148 |
| OUTPATIENT CLIN HEMATOL ONCOL | 1 | 0.148 |
| OUTPATIENT TUMOR CTR ESSEN | 1 | 0.148 |
| OXFORD UNIV HOSP | 1 | 0.148 |
| OZU MUNICIPAL HOSP | 1 | 0.148 |
| PACIFIC NORTHWEST UNIV HLTH SCI | 1 | 0.148 |
| PAKISTAN RAILWAY HOSP | 1 | 0.148 |
| PALMER COLL CHIROPRACT | 1 | 0.148 |
| PARAIBA STATE UNIV | 1 | 0.148 |
| PARIS SACLAY UNIV | 1 | 0.148 |
| PAS | 1 | 0.148 |
| PASTEUR INST IRAN | 1 | 0.148 |
| PEKING UNIV | 1 | 0.148 |
| PENN STATE UNIV | 1 | 0.148 |
| PENNINGTON BIOMED RES CTR | 1 | 0.148 |
| PFIZER INC | 1 | 0.148 |
| PHARMA SERY INT SRL | 1 | 0.148 |
| PHILADELPHIA COLL OSTEOPATH MED | 1 | 0.148 |
| PHYSIOTHERAPIE CTR | 1 | 0.148 |
| PITIE SALPETRIERE CHARLES FOIX UNIV HOSP | 1 | 0.148 |
| POLITECN TORINO | 1 | 0.148 |
| POLO UNIV MACAE | 1 | 0.148 |
| PONTIFICIA UNIV CATOLICA RIO GRANDE DO SUL | 1 | 0.148 |
| PONTIFICIA UNIV CATOLICA RIO GRANDE SUL PUCRS | 1 | 0.148 |
| POOLE HOSP NHS TRUST | 1 | 0.148 |
| PPG | 1 | 0.148 |
| PREFECTURAL UNIV KUMAMOTO | 1 | 0.148 |
| PRINCE WALES HOSP | 1 | 0.148 |
| PRINCESS MARGARET HOSP | 1 | 0.148 |
| PROTEOS | 1 | 0.148 |
| PURDUE PHARMA | 1 | 0.148 |
| PURDUE PHARMA DISCOVERY RES | 1 | 0.148 |
| PURDUE PHARMA LP | 1 | 0.148 |
| QATAR BIOMED RES INST | 1 | 0.148 |
| QUEEN MARGARET UNIV | 1 | 0.148 |
| RADBOUD UNIV NIJMEGEN | 1 | 0.148 |
| RDNS INST | 1 | 0.148 |
| REG HOSP | 1 | 0.148 |
| REHAB STN STOCKHOLM SPINALIS | 1 | 0.148 |
| REHABIL CTR DE HOOGSTRAAT REHABIL UTRECHT | 1 | 0.148 |
| REHABIL INST WASHINGTON PLLC | 1 | 0.148 |
| REINIER DE GRAAF GASTHUIS | 1 | 0.148 |
| RES CTR ALLIED HLTH CARE | 1 | 0.148 |
| RES CTR SPORTS SCI HLTH SCI HUMAN DEV | 1 | 0.148 |
| RHEUMATISM FDN HOSP | 1 | 0.148 |
| RI MUHC | 1 | 0.148 |
| RIBEIRAO PRETO SCH MED | 1 | 0.148 |
| RIGSHOSP | 1 | 0.148 |
| RIKEN | 1 | 0.148 |
| RIPHAH INT UNIV | 1 | 0.148 |
| RMIT UNIV | 1 | 0.148 |
| ROSALIND FRANKLIN UNIV MED SCI | 1 | 0.148 |
| ROSE ELLA BURKHARDT BRAIN TUMOR NEUROONCOL CTR | 1 | 0.148 |
| ROUEN UNIV HOSP | 1 | 0.148 |
| ROYAL LIVERPOOL BROADGREEN UNIV HOSP TRUST | 1 | 0.148 |
| RUTGERS SCH DENT MED | 1 | 0.148 |
| S GIOVANNI DI DIO HOSP | 1 | 0.148 |
| S GIOVANNI PAOLO II | 1 | 0.148 |
| S LUCIA FDN | 1 | 0.148 |
| S MANCHESTER UNIV HOSP NHS TRUST | 1 | 0.148 |
| SAGE COLL | 1 | 0.148 |
| SAIWAICHO MEM HOSP | 1 | 0.148 |
| SANOFI AVENTIS R D | 1 | 0.148 |
| SAO PAULO STATE UNIV | 1 | 0.148 |
| SCRIPPS RES INST | 1 | 0.148 |
| SECOND AFFILIATED HOSP NANTONG | 1 | 0.148 |
| SELCUK UNIV | 1 | 0.148 |
| SEOUL NATL UNIV HOSP | 1 | 0.148 |
| SHAHID BAHONAR UNIV KERMAN | 1 | 0.148 |
| SHAHROOD UNIV TECHNOL | 1 | 0.148 |
| SHANDONG ACAD MED SCI | 1 | 0.148 |
| SHANDONG PROV PEOPLES HOSP | 1 | 0.148 |
| SHANDONG UNIV | 1 | 0.148 |
| SHANGHAI KEY LAB PERIPHERAL NERVE MICROSURG | 1 | 0.148 |
| SHIN KONG MEM HOSP | 1 | 0.148 |
| SHINSHU UNIV | 1 | 0.148 |
| SICHUAN ACAD MED SCI | 1 | 0.148 |
| SICHUAN PROV PEOPLES HOSP | 1 | 0.148 |
| SINGHLTH POLYCLIN BUKIT MERAH | 1 | 0.148 |
| SO CALIF PERMANENTE MED GRP | 1 | 0.148 |
| SO ILLINOIS UNIV | 1 | 0.148 |
| SOOCHOW UNIV | 1 | 0.148 |
| SOONCHUNHYANG UNIV | 1 | 0.148 |
| SOUTH WESTERN SYDNEY LOCAL HLTH DIST | 1 | 0.148 |
| SOUTHWEST BAPTIST UNIV | 1 | 0.148 |
| SPINE NERVE CTR VIRGINIA | 1 | 0.148 |
| SPORTO CLIN | 1 | 0.148 |
| ST ANDREAS HOSP | 1 | 0.148 |
| ST ANTONIUS HOSP | 1 | 0.148 |
| ST GEORGES UNIV LONDON | 1 | 0.148 |
| ST LUKES UNIV HLTH NETWORK | 1 | 0.148 |
| ST MARIEN HOSP | 1 | 0.148 |
| ST MARYS HLTH CTR | 1 | 0.148 |
| ST MARYS HOSP | 1 | 0.148 |
| ST ORSOLA MARCELLO MALPIGHI HOSP | 1 | 0.148 |
| ST PIETRO HOSP | 1 | 0.148 |
| STATE KEY LAB BRAIN COGNIT SCI | 1 | 0.148 |
| STUDY RES CTR | 1 | 0.148 |
| SULEYMAN DEMIREL UNIV | 1 | 0.148 |
| SUNGDUK COLL | 1 | 0.148 |
| SWEDISH CANC INST | 1 | 0.148 |
| SWEDISH HLTH SERV | 1 | 0.148 |
| SWEDISH MED CTR | 1 | 0.148 |
| SWEDISH SCH SPORT HLTH SCI | 1 | 0.148 |
| SYDNEY CHILDRENS HOSP NETWORK RANDWICK WESTMEAD | 1 | 0.148 |
| TAIWAN UNIV SCI TECHNOL | 1 | 0.148 |
| TALLINN UNIV TECHNOL | 1 | 0.148 |
| TAMPERE UNIV HOSP | 1 | 0.148 |
| TAN TOCK SENG HOSP | 1 | 0.148 |
| TAOYUAN ARMED FORCES GEN HOSP | 1 | 0.148 |
| TEHRAN KISH INT UNIV | 1 | 0.148 |
| TEOFILO HERNANDO INST DRUG DISCOVERY | 1 | 0.148 |
| TEXAS LUTHERAN UNIV | 1 | 0.148 |
| THIRD MIL MED UNIV | 1 | 0.148 |
| TIANJIN MED UNIV | 1 | 0.148 |
| TIANJIN UNIV TRADIT CHINESE MED | 1 | 0.148 |
| TIERKLIN SEEHOF | 1 | 0.148 |
| TILBURG UNIV | 1 | 0.148 |
| TOHOKU PHARMACEU UNIV | 1 | 0.148 |
| TOHOKU PHARMACEUT UNIV | 1 | 0.148 |
| TOKAI UNIV | 1 | 0.148 |
| TOKYO METROPOLITAN INST GERONTOL | 1 | 0.148 |
| TOKYO METROPOLITAN INST NEUROSCI | 1 | 0.148 |
| TORONTO GEN RES INST | 1 | 0.148 |
| TRANSNAT UNIV LIMBURG | 1 | 0.148 |
| TRIPLER ARMY MED CTR | 1 | 0.148 |
| TRISERV GEN HOSP | 1 | 0.148 |
| TSINGHUA UNIV | 1 | 0.148 |
| TUFTS MEDCL CTR | 1 | 0.148 |
| TULANE UNIV | 1 | 0.148 |
| TZU CHI UNIV | 1 | 0.148 |
| UCL | 1 | 0.148 |
| UCL INST NEUROL | 1 | 0.148 |
| UCL INST OPHTHALMOL | 1 | 0.148 |
| UCL INST STRUCT MOL BIOL | 1 | 0.148 |
| UCLA VA GREATER LOS ANGELES MULTICAMPUS PHYS MED | 1 | 0.148 |
| UFCSPA | 1 | 0.148 |
| UFF | 1 | 0.148 |
| UIDUK UNIV | 1 | 0.148 |
| UNESP | 1 | 0.148 |
| UNIV ADELAIDE | 1 | 0.148 |
| UNIV AGR SCI VET MED | 1 | 0.148 |
| UNIV ALABAMA BIRMINGHAM | 1 | 0.148 |
| UNIV ALEXANDRIA | 1 | 0.148 |
| UNIV APPL SCI WESTERN SWITZERLAND | 1 | 0.148 |
| UNIV AUTONOMA CHILE | 1 | 0.148 |
| UNIV AUTONOMA QUERETARO | 1 | 0.148 |
| UNIV BASEL HOSP | 1 | 0.148 |
| UNIV BATH | 1 | 0.148 |
| UNIV BIRMINGHAM | 1 | 0.148 |
| UNIV BOJNORD | 1 | 0.148 |
| UNIV CALABRIA | 1 | 0.148 |
| UNIV CALGARY | 1 | 0.148 |
| UNIV CALIF IRVINE | 1 | 0.148 |
| UNIV CAMILO CASTELO BRANCO | 1 | 0.148 |
| UNIV CATANZARO | 1 | 0.148 |
| UNIV CHILDRENS HOSP BASEL | 1 | 0.148 |
| UNIV CLERMONT 1 | 1 | 0.148 |
| UNIV COLL DUBLIN | 1 | 0.148 |
| UNIV COLL PHYSIOTHERAPY THIM VAN DER LAAN | 1 | 0.148 |
| UNIV DUISBURG ESSEN | 1 | 0.148 |
| UNIV EASTERN FINLAND | 1 | 0.148 |
| UNIV ERLANGEN NURNBERG | 1 | 0.148 |
| UNIV ESTADO SANTA CATARINA UDESC | 1 | 0.148 |
| UNIV ESTADUAL LONDRINA | 1 | 0.148 |
| UNIV ESTADUAL PARAIBA | 1 | 0.148 |
| UNIV EUROPEA MADRID | 1 | 0.148 |
| UNIV EVRY | 1 | 0.148 |
| UNIV EXTREMADURA | 1 | 0.148 |
| UNIV FED ALFENAS | 1 | 0.148 |
| UNIV FED ESTADO RIO DE JANEIRO | 1 | 0.148 |
| UNIV FED MINAS GERAIS | 1 | 0.148 |
| UNIV FED PARANA | 1 | 0.148 |
| UNIV FED PELOTAS | 1 | 0.148 |
| UNIV FED PIAUI | 1 | 0.148 |
| UNIV FED RIO DE JANEIRO | 1 | 0.148 |
| UNIV FED VALE SAO FRANCISCO | 1 | 0.148 |
| UNIV GENEVA | 1 | 0.148 |
| UNIV GENOA | 1 | 0.148 |
| UNIV GRANADA | 1 | 0.148 |
| UNIV GREENWICH | 1 | 0.148 |
| UNIV GRONINGEN | 1 | 0.148 |
| UNIV GUELPH HUMBER | 1 | 0.148 |
| UNIV HAIFA | 1 | 0.148 |
| UNIV HAWAII MANOA | 1 | 0.148 |
| UNIV HEIDELBERG HOSP | 1 | 0.148 |
| UNIV HELSINKI HOSP | 1 | 0.148 |
| UNIV HERTFORDSHIRE | 1 | 0.148 |
| UNIV HLTH NETWORK | 1 | 0.148 |
| UNIV HOSP CLEVELAND | 1 | 0.148 |
| UNIV HOSP COMPLEX GRANADA | 1 | 0.148 |
| UNIV HOSP FERRARA | 1 | 0.148 |
| UNIV HOSP GENEVA | 1 | 0.148 |
| UNIV HOSP GHENT | 1 | 0.148 |
| UNIV HOSP HOSP CTR | 1 | 0.148 |
| UNIV HOSP LEIPZIG | 1 | 0.148 |
| UNIV HOSP LIEGE | 1 | 0.148 |
| UNIV HOSP ULM | 1 | 0.148 |
| UNIV HOSP WALES | 1 | 0.148 |
| UNIV HOSP WOMEN | 1 | 0.148 |
| UNIV ICELAND | 1 | 0.148 |
| UNIV INDONESIA | 1 | 0.148 |
| UNIV IOWA HOSP CLIN | 1 | 0.148 |
| UNIV ISFAHAN | 1 | 0.148 |
| UNIV JORDAN | 1 | 0.148 |
| UNIV KANSAS MED CTR | 1 | 0.148 |
| UNIV KENTUCKY | 1 | 0.148 |
| UNIV KINGSTON | 1 | 0.148 |
| UNIV KLIN | 1 | 0.148 |
| UNIV KLINIKUM KOLN | 1 | 0.148 |
| UNIV LAVAL | 1 | 0.148 |
| UNIV LEIPZIG | 1 | 0.148 |
| UNIV LIBRE BRUXELLES | 1 | 0.148 |
| UNIV LIEGE | 1 | 0.148 |
| UNIV LISBOA ULISBOA | 1 | 0.148 |
| UNIV LISBON | 1 | 0.148 |
| UNIV LIVERPOOL | 1 | 0.148 |
| UNIV LIVERPOOL LIVERPOOL SCH TROP MED | 1 | 0.148 |
| UNIV MAGDEBURG | 1 | 0.148 |
| UNIV MALAWI | 1 | 0.148 |
| UNIV MALAYA | 1 | 0.148 |
| UNIV MASSACHUSETTS | 1 | 0.148 |
| UNIV MED CTR | 1 | 0.148 |
| UNIV MED CTR UTRECHT | 1 | 0.148 |
| UNIV MED PHARM IULIU HATIEGANU | 1 | 0.148 |
| UNIV MELBOURNE | 1 | 0.148 |
| UNIV MERSIN | 1 | 0.148 |
| UNIV METODISTA PIRACICABA | 1 | 0.148 |
| UNIV MICHIGAN HLTH SYST | 1 | 0.148 |
| UNIV MISSISSIPPI | 1 | 0.148 |
| UNIV MONTPELLIER | 1 | 0.148 |
| UNIV MONTPELLIER 2 | 1 | 0.148 |
| UNIV MONTPELLIER I | 1 | 0.148 |
| UNIV NEW MEXICO | 1 | 0.148 |
| UNIV NIS | 1 | 0.148 |
| UNIV NORTHERN PARANA UNOPAR | 1 | 0.148 |
| UNIV NOVE JULHO | 1 | 0.148 |
| UNIV NURSING | 1 | 0.148 |
| UNIV OESTE SANTA CATARINA | 1 | 0.148 |
| UNIV OKLAHOMA | 1 | 0.148 |
| UNIV PACIFIC | 1 | 0.148 |
| UNIV PARIS 06 | 1 | 0.148 |
| UNIV PARIS DIDEROT | 1 | 0.148 |
| UNIV PERNAMBUCO | 1 | 0.148 |
| UNIV PIEMONTE ORIENTALE | 1 | 0.148 |
| UNIV PORTO ICETA | 1 | 0.148 |
| UNIV PUBL NAVARRA | 1 | 0.148 |
| UNIV PUERTO RICO | 1 | 0.148 |
| UNIV QUEBEC TROIS RIVIERES | 1 | 0.148 |
| UNIV REGENSBURG | 1 | 0.148 |
| UNIV ROME | 1 | 0.148 |
| UNIV SANTA CATARINA | 1 | 0.148 |
| UNIV SASSARI | 1 | 0.148 |
| UNIV SCRANTON | 1 | 0.148 |
| UNIV SHEFFIELD | 1 | 0.148 |
| UNIV SHERBROOKE | 1 | 0.148 |
| UNIV SO CALIF | 1 | 0.148 |
| UNIV SOUTH CAROLINA | 1 | 0.148 |
| UNIV SOUTHERN SANTA CATARINA TUBARAO | 1 | 0.148 |
| UNIV SOUTHERN SANTA CATARINA UNISUL | 1 | 0.148 |
| UNIV STOCKHOLM | 1 | 0.148 |
| UNIV STRASBOURG | 1 | 0.148 |
| UNIV STRATHCLYDE | 1 | 0.148 |
| UNIV SUNSHINE COAST | 1 | 0.148 |
| UNIV TABRIZ | 1 | 0.148 |
| UNIV TABUK | 1 | 0.148 |
| UNIV TARTU | 1 | 0.148 |
| UNIV TENNESSEE | 1 | 0.148 |
| UNIV TEXAS AUSTIN | 1 | 0.148 |
| UNIV THRACE | 1 | 0.148 |
| UNIV TOKYO | 1 | 0.148 |
| UNIV TURIN | 1 | 0.148 |
| UNIV ULM | 1 | 0.148 |
| UNIV URBINO CARLO BO | 1 | 0.148 |
| UNIV UTRECHT | 1 | 0.148 |
| UNIV VERONA | 1 | 0.148 |
| UNIV VITA SALUTE SAN RAFFAELE | 1 | 0.148 |
| UNIV WESTERN ONTARIO | 1 | 0.148 |
| UNIV WESTERN SAO PAULO UNOESTE | 1 | 0.148 |
| UNIV ZULIA | 1 | 0.148 |
| UNIV ZURICH HOSP | 1 | 0.148 |
| UNOESC | 1 | 0.148 |
| UPEC | 1 | 0.148 |
| UPPSALA UNIV | 1 | 0.148 |
| UQTR | 1 | 0.148 |
| URLA STATE HOSP | 1 | 0.148 |
| URMIA UNIV MED SCI | 1 | 0.148 |
| US ARMY BAYLOR UNIV DOCTORAL PROGRAM PHYS THERAPY | 1 | 0.148 |
| US ARMY MED RES MAT COMMAND | 1 | 0.148 |
| USAK UNIV | 1 | 0.148 |
| VA CONNECTICUT HEALTHCARE SYST | 1 | 0.148 |
| VA GREATER LOS ANGELES | 1 | 0.148 |
| VA MED CTR | 1 | 0.148 |
| VA PUGET SOUND HLTH CARE SYST | 1 | 0.148 |
| VAL DE GRACE HOSP | 1 | 0.148 |
| VALI E ASR UNIV RAFSANJAN | 1 | 0.148 |
| VANDERBILT UNIV | 1 | 0.148 |
| VERG | 1 | 0.148 |
| VET ADM | 1 | 0.148 |
| VET AFFAIRS MED CTR | 1 | 0.148 |
| VET AFFAIRS PALO ALTO HLTH CARE SYST | 1 | 0.148 |
| VETCT | 1 | 0.148 |
| VIRGEN DEL ROCIO UNIV HOSP | 1 | 0.148 |
| VIRGINIA POLYTECH INST STATE UNIV | 1 | 0.148 |
| VISN 8 PATIENT SAFETY CTR INQUIRY | 1 | 0.148 |
| VIV ARTE BEWEGUNGSSCHULE | 1 | 0.148 |
| VIVANTES CLIN NEUKOELLN | 1 | 0.148 |
| VRIJE UNIV AMSTERDAM | 1 | 0.148 |
| VZENIUM LLC | 1 | 0.148 |
| WAKE FOREST SCH MED | 1 | 0.148 |
| WAKE FOREST UNIV HLTH SCI | 1 | 0.148 |
| WALTER REED ARMY MED CTR | 1 | 0.148 |
| WARSAW UNIV LIFE SCI | 1 | 0.148 |
| WEILL CORNELL MED COLL | 1 | 0.148 |
| WEILL CORNELL MED QATAR | 1 | 0.148 |
| WEST HOUSTON MED CTR | 1 | 0.148 |
| WINGATE UNIV | 1 | 0.148 |
| WOMENS COLL RES INST | 1 | 0.148 |
| WONKWANG UNIV | 1 | 0.148 |
| XENOPORT INC | 1 | 0.148 |
| XIAN MED UNIV | 1 | 0.148 |
| XIAN TECHNOL UNIV | 1 | 0.148 |
| XINXIANG MED UNIV | 1 | 0.148 |
| XUZHOU MED UNIV | 1 | 0.148 |
| YALE UNIV | 1 | 0.148 |
| YANAN UNIV | 1 | 0.148 |
| YANGZHOU UNIV | 1 | 0.148 |
| YOUNGDONG UNIV | 1 | 0.148 |
| YUKSEKOVA STATE HOSP | 1 | 0.148 |
| YUZUNCU YIL UNIV | 1 | 0.148 |
| ZEALAND UNIV HOSP | 1 | 0.148 |
| ZHOUKOU CENT HOSP | 1 | 0.148 |
| ZIEKENHUIS OOST LIMBURG | 1 | 0.148 |
| ZIEKENHUISGRP TWENTE | 1 | 0.148 |
